# Supplementary material for: A Phase 2 Trial of Ibrutinib and Nivolumab in Patients with Relapsed or Refractory Classical Hodgkin’s Lymphoma
Source: MDPI journal article supplement (doi:10.3390/cancers15051437), 2023-02-24
Supplement: s1 [file s1]

**Table S1.** Comparison of the median percentage of PD-1+ cells in T cell subsets of the subjects that were not exposed to nivolumab for at least 200 days before enrollment on the trial, Cycle 1, Day 1.

| Immune markers            | Responder median (n=7) | Nonresponder median (n=3) | Wilcoxon p-value | T-test p-value |
|---------------------------|------------------------|---------------------------|------------------|----------------|
| % PD1 in CD3              | 23.24                  | 19.38                     | 0.49412          | 0.63           |
| % PD-1 in CD4             | 22.26                  | 18.34                     | 1                | 0.68           |
| % PD-1 in CD8             | 30.354                 | 22.913                    | 0.49412          | 0.55           |
| % PD-1 in CD4+/CD8+       | 39.4                   | 32.09                     | 0.81971          | 0.84           |
| %PD-1 in Perf+/GrB+/CD4+  | 38.41                  | 37.5                      | 1                | 0.69           |
| % PD-1 in Perf+/GrB-/CD4+ | 46.711                 | 27.27                     | 0.17146          | 0.26           |
| % PD-1 in Perf+/GrB-/CD8+ | 39.479                 | 30                        | 0.36193          | 0.29           |
| % PD-1 in Perf+/Grb+/CD8+ | 40.706                 | 32.56                     | 0.36193          | 0.38           |
| % PD-1 in CD4+/HLA-DR+    | 53.34                  | 26.67                     | 0.36193          | 0.18           |
| % PD-1 in CD8+/HLADR+     | 35.69                  | 36.39                     | 1                | 0.7            |
| % PD-1 in CD28+/CD4+      | 23.024                 | 18.85                     | 0.81971          | 0.65           |
| % PD-1 in CD28+/CD8+      | 19.712                 | 17.72                     | 0.49412          | 0.87           |
| % PD-1 in CD25+/CD4+      | 27.521                 | 17.56                     | 0.49412          | 0.57           |
| % PD-1 in CD25+/CD8+      | 19.601                 | 15.84                     | 0.6485           | 0.57           |
| % PD-1 in CD4+/FoxP3+     | 32.325                 | 29.962                    | 0.81971          | 0.68           |
| % PD-1 in CD8+/FoxP3+     | 45.455                 | 25                        | 0.49412          | 0.46           |
| % PD-1 in CD4+/Tbet+      | 39.631                 | 28.57                     | 0.49281          | 0.7            |
| % PD-1 in CD8+/Tbet+      | 36.684                 | 33.93                     | 0.49412          | 0.49           |
| % PD-1 in CD4+/GATA3+     | 38.89                  | 43.93                     | 0.65             | 0.55           |
| % PD-1 in CD8+/GATA3+     | 28.767                 | 40.26                     | 0.36193          | 0.27           |
| % PD-1 in CD4+/Fas+       | 35.881                 | 25.81                     | 0.81971          | 0.66           |
| % PD-1 in CD8+/Fas+       | 34.003                 | 36.45                     | 1                | 0.76           |
| % PD-1 in NKG2D+/CD4+     | 45.61                  | 53.623                    | 0.49412          | 0.28           |
| % PD-1 in NKG2D+/CD8+     | 38.673                 | 29.6                      | 0.49412          | 0.38           |
| % PD-1 in CD45RA+/CD4+    | 10.227                 | 13.71                     | 0.73166          | 0.44           |
| % PD-1 in CD45RA+/CD8+    | 19.53                  | 10.98                     | 0.49412          | 0.53           |
| % PD-1 in CD45RO+/CD4+    | 35.728                 | 20.18                     | 0.6485           | 0.43           |
| % PD-1 in CD45RO+/CD8+    | 34.791                 | 35.97                     | 1                | 0.54           |
| % PD-1 in CD62L+/CD4+     | 19.718                 | 19.46                     | 0.81971          | 0.9            |
| % PD-1 in CD62L+/CD8+     | 21.839                 | 20.6                      | 0.6485           | 0.69           |
| % PD-1 in PD-L1+/CD4+     | 31.974                 | 19.05                     | 0.81971          | 0.7            |
| % PD-1 in PD-L1+/CD8+     | 37.412                 | 24.24                     | 0.49412          | 0.31           |
| % PD-1 in LAG3+/CD4+      | 40.738                 | 25.89                     | 1                | 0.89           |
| % PD-1 in LAG3+/CD8+      | 43.966                 | 33.33                     | 0.49412          | 0.75           |
| % PD-1 in CTLA4+/CD4+     | 40.367                 | 50                        | 0.81971          | 0.83           |
| % PD-1 in CTLA4+/CD8+     | 43.651                 | 12.7                      | 0.36193          | 0.38           |
| % PD-1 in CD57+/CD4+      | 45.455                 | 74.157                    | 0.49412          | 0.25           |
| % PD-1 in CD57+/CD8+      | 44.702                 | 24.26                     | 0.36193          | 0.4            |
| % PD-1 in Tim3+/CD4+      | 44.186                 | 52.63                     | 0.25445          | 0.38           |

|                                    |        |        |         |      |
|------------------------------------|--------|--------|---------|------|
| % PD-1 in Tim3+/CD8+               | 42.739 | 15.79  | 0.17146 | 0.17 |
| % PD-1 in Perf Hi/Granzyme B+/CD4+ | 53.571 | 33.333 | 1       | 0.91 |
| % PD-1 in Perf Hi/Granzyme B+/CD8+ | 41.387 | 39.604 | 0.49412 | 0.45 |

**Table S2.** Comparison of the median percentages of cells expressing the designated immune markers among CD8+/PD-1+ T cells in the subjects that were not exposed to nivolumab for at least 200 days before enrollment on the trial, Cycle 1, Day 1.

| Immune marker | Responder median (n=7) | Nonresponder median (n=3) | Wilcoxon p-value | T-test p-value |
|---------------|------------------------|---------------------------|------------------|----------------|
| FoxP3+        | 12.1                   | 7.69                      | 0.25445          | 0.3            |
| Tbet+         | 15.962                 | 7.22                      | 0.36193          | 0.32           |
| GATA3+        | 1.48                   | 1.03                      | 1                | 0.94           |
| Perf+/GrB+    | 17.91                  | 29.87                     | 0.56764          | 0.58           |
| Perf+ Hi/GrB+ | 1.097                  | 0.323                     | 0.81752          | 0.81           |
| Perf+/GrB-    | 5.105                  | 3.09                      | 0.6485           | 0.47           |
| HLA-DR+       | 28.36                  | 32.99                     | 1                | 0.94           |
| CD28+         | 94.72                  | 92.78                     | 0.6485           | 0.72           |
| CD25+         | 43.279                 | 51.13                     | 0.17146          | 0.14           |
| CD95+/Fas+    | 96.244                 | 78.96                     | 1                | 0.79           |
| NKG2D+        | 3.767                  | 1.6                       | 0.25445          | 0.69           |
| CD45RA+       | 7.069                  | 2.606                     | 0.49412          | 0.58           |
| CD45RO+       | 96.358                 | 97.988                    | 0.6485           | 0.9            |
| CD62L+        | 51.6                   | 38.363                    | 0.49412          | 0.72           |
| PD-L1+        | 5.778                  | 2.378                     | 0.49412          | 0.54           |
| PD-L2+        | 6.52                   | 10.105                    | 0.17146          | 0.29           |
| LAG3+         | 0.288                  | 2.26                      | 0.6485           | 0.97           |
| CTLA4+        | 0.274                  | 1.13                      | 0.06825          | 0.09           |
| CD57+         | 3.727                  | 2.972                     | 1                | 0.55           |
| Tim-3+        | 2.122                  | 2.04                      | 1                | 0.61           |

**Table S3.** Comparison of the median percentages of cells expressing the designated immune markers among CD4+/PD-1+ T cells in the subjects that were not exposed to nivolumab for at least 200 days before enrollment on the trial, Cycle 1, Day 1.

| <b>Immune marker</b> | <b>Responder median (n=7)</b> | <b>Nonresponder median (n=3)</b> | <b>Wilcoxon p-value</b> | <b>T-test p-value</b> |
|----------------------|-------------------------------|----------------------------------|-------------------------|-----------------------|
| FoxP3+               | 12.1                          | 7.69                             | 0.25445                 | 0.3                   |
| Tbet+                | 15.962                        | 7.22                             | 0.36193                 | 0.32                  |
| GATA3+               | 1.48                          | 1.03                             | 1                       | 0.94                  |
| Perf+ GrB+           | 17.91                         | 29.87                            | 0.56764                 | 0.58                  |
| Perf+ HI GrB+        | 1.097                         | 0.323                            | 0.81752                 | 0.81                  |
| Perf+ GrB-           | 5.105                         | 3.09                             | 0.6485                  | 0.47                  |
| HLA-DR+              | 28.36                         | 32.99                            | 1                       | 0.94                  |
| CD28+                | 94.72                         | 92.78                            | 0.6485                  | 0.72                  |
| CD25+                | 43.279                        | 51.13                            | 0.17146                 | 0.14                  |
| CD95 Fas             | 96.244                        | 78.96                            | 1                       | 0.79                  |
| NKG2D                | 3.767                         | 1.6                              | 0.25445                 | 0.69                  |
| CD45RA               | 7.069                         | 2.606                            | 0.49412                 | 0.58                  |
| CD45RO               | 96.358                        | 97.988                           | 0.6485                  | 0.9                   |
| CD62L                | 51.6                          | 38.363                           | 0.49412                 | 0.72                  |
| PD-L1                | 5.778                         | 2.378                            | 0.49412                 | 0.54                  |
| PD-L2                | 6.52                          | 10.105                           | 0.17146                 | 0.29                  |
| LAG3                 | 0.288                         | 2.26                             | 0.6485                  | 0.97                  |
| CTLA4                | 0.274                         | 1.13                             | 0.06825                 | 0.09                  |
| CD57                 | 3.727                         | 2.972                            | 1                       | 0.55                  |
| Tim-3                | 2.122                         | 2.04                             | 1                       | 0.61                  |

**Table S4.** Comparison of the median percentages of T cells expressing the designated immune markers between all responders and all non-responders, Cycle 1, Day 1.

| Immune marker      | Responder median (n=9) | Nonresponder median (n=5) | Wilcoxon p-value | T-test p-value |
|--------------------|------------------------|---------------------------|------------------|----------------|
| FoxP3+/CD4+        | 3.124                  | 1.776                     | 0.0455           | 0.17           |
| Tbet+/CD4+         | 3.33                   | 2.073                     | 0.50499          | 0.44           |
| GATA3+/CD4+        | 0.494                  | 0.074                     | 0.1096           | 0.27           |
| Perf+/GrB+/CD4+    | 4.741                  | 1.049                     | 0.50499          | 0.27           |
| Perf+ HI/GrB+/CD4+ | 0.188                  | 0.0323                    | 0.28077          | 0.15           |
| Perf+/GrB-/CD4+    | 1.111                  | 0.814                     | 0.42371          | 0.41           |
| HLA-DR+/CD4+       | 4.572                  | 7.934                     | 0.14247          | 0.15           |
| CD28+/CD4+         | 21.746                 | 37.327                    | 0.28612          | 0.47           |
| CD25+/CD4+         | 12.778                 | 26.971                    | 0.35065          | 0.31           |
| CD95+/CD4+         | 15.958                 | 20.057                    | 0.23014          | 0.31           |
| NKG2D+/CD4+        | 1.55                   | 0.974                     | 0.5938           | 0.52           |
| CD45RA+/CD4+       | 5.774                  | 0.817                     | 0.14247          | 0.15           |
| CD45RO+/CD4+       | 17.619                 | 41.877                    | 0.23014          | 0.3            |
| CD62L+/CD4+        | 7.111                  | 8.542                     | 1                | 0.73           |
| PD-L1+/CD4+        | 1.885                  | 1.42                      | 0.78973          | 0.34           |
| PD-L2+/CD4+        | 1.03                   | 2.414                     | 0.35065          | 0.17           |
| LAG3+/CD4+         | 0.125                  | 0.212                     | 0.68883          | 0.68           |
| CTLA4+/CD4+        | 0.233                  | 0.378                     | 0.23014          | 0.18           |
| CD57+/CD4+         | 0.749                  | 0.516                     | 0.42371          | 0.38           |
| Tim-3+/CD4+        | 2.308                  | 0.72                      | 0.02341          | 0.055          |
| FoxP3+/CD8+        | 3.492                  | 4.957                     | 0.50499          | 0.26           |
| Tbet+/CD8+         | 11.291                 | 3.466                     | 0.28612          | 0.25           |
| GATA3+/CD8+        | 1.579                  | 0.465                     | 0.5938           | 0.53           |
| Perf+/GrB+/CD8+    | 20.961                 | 18.595                    | 0.78973          | 0.8            |
| Perf+ HI/GrB+/CD8+ | 6.977                  | 6.603                     | 0.78973          | 0.69           |
| Perf+/GrB-/CD8+    | 14.808                 | 5.209                     | 0.35065          | 0.38           |
| HLA-DR+/CD8+       | 8.693                  | 7.7                       | 0.89393          | 0.99           |
| CD28+/CD8+         | 16.032                 | 11.975                    | 0.78973          | 0.44           |
| CD25+/CD8+         | 9.302                  | 6.725                     | 0.78973          | 0.44           |
| CD95+/CD8+         | 29.133                 | 17.765                    | 0.50499          | 0.33           |
| NKG2D+/CD8+        | 9.302                  | 5.329                     | 0.5938           | 0.94           |
| CD45RA+/CD8+       | 16.849                 | 12.876                    | 0.18242          | 0.2            |
| CD45RO+/CD8+       | 18.413                 | 24.056                    | 0.06195          | 0.07           |
| CD62L+/CD8+        | 18.605                 | 15.909                    | 0.18242          | 0.14           |
| PD-L1+/CD8+        | 1.684                  | 0.446                     | 0.06195          | 0.15           |
| PD-L2+/CD8+        | 1.056                  | 1.102                     | 0.89393          | 0.61           |
| LAG3+/CD8+         | 0.448                  | 0.243                     | 1                | 0.56           |
| CTLA4+/CD8+        | 0.68                   | 1.149                     | 0.50499          | 0.51           |

|             |       |       |         |      |
|-------------|-------|-------|---------|------|
| CD57+/CD8+  | 6.732 | 6.816 | 0.68916 | 0.74 |
| Tim-3+/CD8+ | 2.326 | 1.406 | 0.08304 | 0.19 |

**Table S5.** Comparison of the median percentages of T cells expressing the designated immune markers between all responders and all non-responders, Cycle 4, Day 1.

| Immune marker      | Responder median (n=8) | Nonresponder median (n=4) | Wilcoxon p-value | T-test p-value |
|--------------------|------------------------|---------------------------|------------------|----------------|
| FoxP3+/CD4+        | 3.384                  | 3.11                      | 0.93232          | 0.65           |
| Tbet+/CD4+         | 3.4745                 | 1.755                     | 0.4447           | 0.2            |
| GATA3+/CD4+        | 0.296                  | 0.225                     | 0.73365          | 0.4            |
| Perf+/GrB+/CD4+    | 5.8775                 | 3.2455                    | 0.26961          | 0.21           |
| Perf+ HI/GrB+ CD4+ | 2.6165                 | 0.0709                    | 0.0508           | 0.12           |
| Perf+/GrB-/CD4+    | 0.64                   | 0.729                     | 0.67113          | 0.17           |
| HLA-DR+/CD4+       | 4.772                  | 9.445                     | 0.10664          | 0.051          |
| CD28+/CD4+         | 14.0645                | 40.119                    | 0.35024          | 0.4            |
| CD25+/CD4+         | 8.2555                 | 22.2365                   | 0.26961          | 0.48           |
| CD95+/CD4+         | 12.95                  | 24.461                    | 0.35024          | 0.37           |
| NKG2D+/CD4+        | 2.054                  | 0.872                     | 0.26961          | 0.18           |
| CD45RA+/CD4+       | 7.8805                 | 4.764                     | 0.20273          | 0.21           |
| CD45RO+/CD4+       | 11.7965                | 41.9895                   | 0.26961          | 0.2            |
| CD62L+/CD4+        | 8.6185                 | 12.1615                   | 0.67113          | 0.77           |
| PD-L1+/CD4+        | 1.5115                 | 1.2265                    | 0.93232          | 0.87           |
| PD-L2+/CD4+        | 1.7025                 | 3.0295                    | 0.10664          | 0.07           |
| LAG3+/CD4+         | 0.126                  | 0.2491                    | 0.79752          | 0.56           |
| CTLA4+/CD4+        | 0.27                   | 0.367                     | 0.67113          | 0.55           |
| CD57+/CD4+         | 0.963                  | 0.7                       | 0.26961          | 0.34           |
| Tim-3+/CD4+        | 1.329                  | 0.7605                    | 0.26961          | 0.2            |
| FoxP3+/CD8+        | 4.075                  | 4.6645                    | 0.79891          | 0.22           |
| Tbet+/CD8+         | 28.649                 | 3.068                     | 0.14884          | 0.08           |
| GATA3+/CD8+        | 0.9285                 | 0.6905                    | 0.4447           | 0.36           |
| Perf+/GrB+/CD8+    | 29.4905                | 23.538                    | 0.67113          | 0.7            |
| Perf+ HI/GrB+/CD8+ | 21.912                 | 10.2415                   | 0.20273          | 0.31           |
| Perf+/GrB-/CD8+    | 10.306                 | 9.6285                    | 0.93232          | 0.6            |
| HLA-DR+/CD8+       | 9.082                  | 11.4115                   | 0.55221          | 0.41           |
| CD28+/CD8+         | 17.696                 | 15.6425                   | 0.79891          | 0.55           |
| CD25+/CD8+         | 6.5735                 | 10.9625                   | 0.4447           | 0.23           |
| CD95+/CD8+         | 26.8285                | 26.9235                   | 0.79891          | 0.67           |
| NKG2D+/CD8+        | 15.669                 | 9.384                     | 0.93232          | 0.83           |
| CD45RA+/CD8+       | 20.1525                | 11.568                    | 0.26961          | 0.19           |
| CD45RO+/CD8+       | 17.424                 | 26.5885                   | 0.02186          | 0.03           |
| CD62L+/CD8+        | 25.059                 | 18.1145                   | 0.4447           | 0.52           |
| PD-L1+/CD8+        | 1.479                  | 0.835                     | 0.93232          | 0.33           |
| PD-L2+/CD8+        | 1.2                    | 1.4485                    | 0.55221          | 0.71           |
| LAG3+/CD8+         | 0.293                  | 0.637                     | 0.10664          | 0.06           |
| CTLA4+/CD8+        | 0.5805                 | 1.3945                    | 0.4447           | 0.14           |
| CD57+/CD8+         | 8.5715                 | 9.394                     | 1                | 0.9            |

|             |       |        |         |      |
|-------------|-------|--------|---------|------|
| Tim-3+/CD8+ | 4.285 | 3.1505 | 0.55221 | 0.41 |
|-------------|-------|--------|---------|------|

**Table S6.** Comparison of the median percentages of T cells expressing the designated immune markers between all responders and all non-responders, Cycle 4, Day 1.

| <b>Immune marker</b> | <b>Responder median (n=3)</b> | <b>Nonresponder median (n=1)</b> |
|----------------------|-------------------------------|----------------------------------|
| FoxP3+/CD4+          | 2.182                         | 3.256                            |
| Tbet+/CD4+           | 0.919                         | 1.598                            |
| GATA3+/CD4+          | 0.364                         | 0.109                            |
| Perf+/GrB+/CD4+      | 0.727                         | 0.287                            |
| Perf+ HI/GrB+/CD4+   | 0.0249                        | 0.029                            |
| Perf+/GrB-/CD4+      | 0.647                         | 1.125                            |
| HLA-DR+/CD4+         | 3.05                          | 4.506                            |
| CD28+/CD4+           | 13.893                        | 31.723                           |
| CD25+/CD4+           | 8.389                         | 19.805                           |
| CD95+/CD4+           | 13.064                        | 29.543                           |
| NKG2D+/CD4+          | 2.545                         | 0.35                             |
| CD45RA+/CD4+         | 10.146                        | 15.214                           |
| CD45RO+/CD4+         | 12.997                        | 30.488                           |
| CD62L+/CD4+          | 8.123                         | 18.586                           |
| PD-L1+/CD4+          | 0.368                         | 0.339                            |
| PD-L2+ CD4+          | 1.257                         | 0.876                            |
| LAG3+/CD4+           | 0                             | 0.178                            |
| CTLA4+/CD4+          | 0.0332                        | 0.441                            |
| CD57+/CD4+           | 0.239                         | 0.223                            |
| Tim-3+/CD4+          | 0.488                         | 0.501                            |
| FoxP3+/CD8+          | 1.558                         | 3.091                            |
| Tbet+/CD8+           | 14.545                        | 1.578                            |
| GATA3+/CD8+          | 1.091                         | 0.194                            |
| Perf+/GrB+/CD8+      | 9.818                         | 1.433                            |
| Perf+ HI/GrB+/CD8+   | 6.182                         | 0.201                            |
| Perf+/GrB-/CD8+      | 24.35                         | 16.455                           |
| HLA-DR+/CD8+         | 5.902                         | 10.931                           |
| CD28+/CD8+           | 11.353                        | 11.66                            |
| CD25+/CD8+           | 2.182                         | 3.236                            |
| CD95+/CD8+           | 9.326                         | 12.611                           |
| NKG2D+/CD8+          | 9.9                           | 8.081                            |
| CD45RA+/CD8+         | 9.383                         | 14.046                           |
| CD45RO+/CD8+         | 12.378                        | 21.454                           |
| CD62L+/CD8+          | 16.86                         | 15.76                            |
| PD-L1+/CD8+          | 0.147                         | 0.152                            |
| PD-L2+/CD8+          | 0.177                         | 0.457                            |
| LAG3+/CD8+           | 0.192                         | 0.131                            |
| CTLA4+/CD8+          | 0.365                         | 0.421                            |

|             |       |       |
|-------------|-------|-------|
| CD57+/CD8+  | 5.338 | 3.485 |
| Tim-3+/CD8+ | 4     | 1.219 |

**Table S7.** Antibodies used for mass cytometry.

| <b>Metal</b> | <b>Mass</b> | <b>Target</b> | <b>Clone</b> | <b>Vendor</b>  |
|--------------|-------------|---------------|--------------|----------------|
| Y            | 89          | CD235         | HIR2         | Biolegend      |
| In           | 113         | CD3           | UCHT1        | Biolegend      |
| In           | 115         | CD45          | HI30         | Biolegend      |
| La           | 139         | Granzyme B    | QA16A02      | Biolegend      |
| Ce           | 140         | cPARP         | F21-852      | BD Biosciences |
| Nd           | 142         | CD7           | CD7-6B7      | Biolegend      |
| Nd           | 143         | T-Bet         | eBio4B10     | eBioscience    |
| Nd           | 144         | CD95 (Fas)    | DX2          | Biolegend      |
| Nd           | 145         | CD4           | RPA-T4       | Biolegend      |
| Nd           | 146         | CD8a          | RPA-T8       | Biolegend      |
| Sm           | 147         | CD56          | HCD56        | Biolegend      |
| Nd           | 148         | CD62L         | DREG-56      | Biolegend      |
| Sm           | 149         | CD127         | A019D5       | Fluidigm       |
| Nd           | 150         | CD45RO        | UCHL1        | Biolegend      |
| Eu           | 151         | CD14          | M5E2         | Fluidigm       |
| Sm           | 152         | CD33          | WM53         | Biolegend      |
| Eu           | 153         | HLA-DR        | L243         | Biolegend      |
| Sm           | 154         | TIM-3         | F382E2       | Biolegend      |
| Gd           | 155         | CD279 (PD-1)  | EH12.2H7     | Biolegend      |
| Gd           | 157         | CD161         | HP-3G10      | Biolegend      |
| Gd           | 158         | CD45RA        | HI100        | Biolegend      |
| Tb           | 159         | GATA3         | 16E10A23     | Biolegend      |
| Gd           | 160         | CD28          | CD28.2       | Fluidigm       |
| Dy           | 161         | CD16          | 3G8          | Biolegend      |
| Dy           | 162         | Foxp3         | PCH101       | Fluidigm       |
| Dy           | 163         | Perforin      | B-D48        | Abcam          |
| Dy           | 164         | CD15          | W6D3         | Biolegend      |
| Er           | 166         | NKG2D         | 1D11         | Biolegend      |
| Tm           | 169         | CD25          | 2A3          | Fluidigm       |
| Er           | 170         | CTLA-4        | 14D3         | Fluidigm       |
| Yb           | 171         | CD226         | DX11         | Fluidigm       |
| Yb           | 172         | CD273 (PD-L2) | 24F.10C12    | Fluidigm       |
| Yb           | 173         | CD19          | HIB19        | Biolegend      |
| Yb           | 174         | CD57          | HNK-1        | Biolegend      |
| Lu           | 175         | CD274 (PD-L1) | 29E.2A3      | Biolegend      |
| Yb           | 176         | LAG3          | 1009614      | R&D Systems    |
| Bi           | 209         | CD11b         | ICRF44       | Biolegend      |

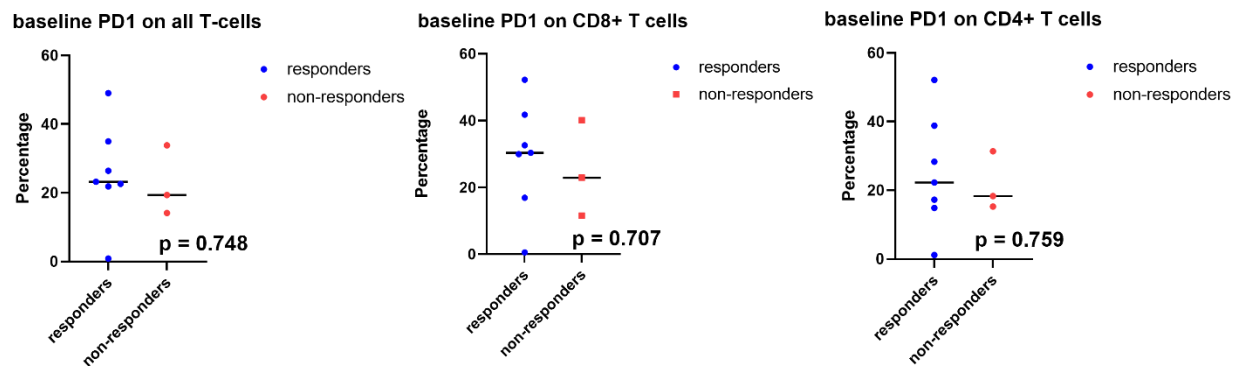

**Figure S1.** Quantification of the average PD1 positive cells between responders (n=7) and non-responders (n=3) at baseline in all T-cells (left), CD8+ T-cells (middle) and CD4+ T-cells (right). Each dot represents an individual patient.

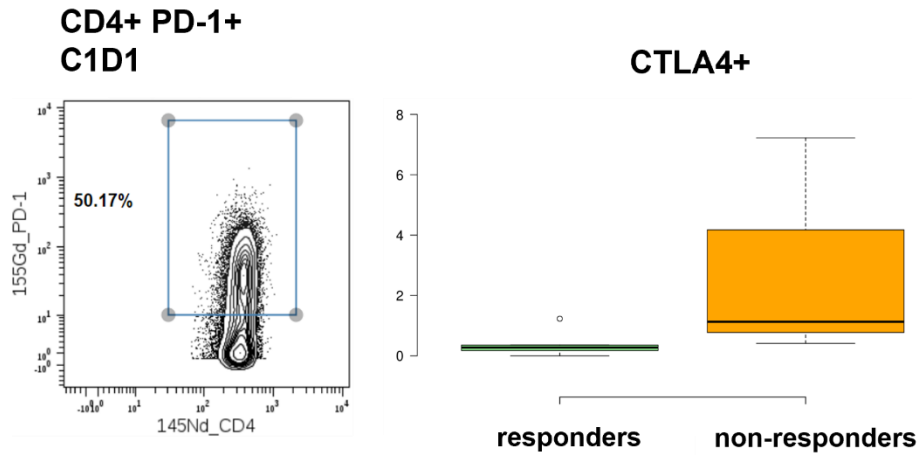

**Figure S2.** Representative percentage of CD4+/PD-1+ cells on C1D1 (**left**) and analysis of CTLA-4 expression in CD4+/PD-1+ T cells (**right**) showed a trend towards higher percentage of CTLA4+ in non-responders. p-value 0.068 (Wilcoxon) and 0.09 (t-test). Center lines show the medians; box limits indicate the 25th and 75th percentiles; whiskers extend 1.5 times the interquartile range from the 25th and 75th percentiles, outliers are represented by dots. n = 7 (responders) and 3 (non-responders).

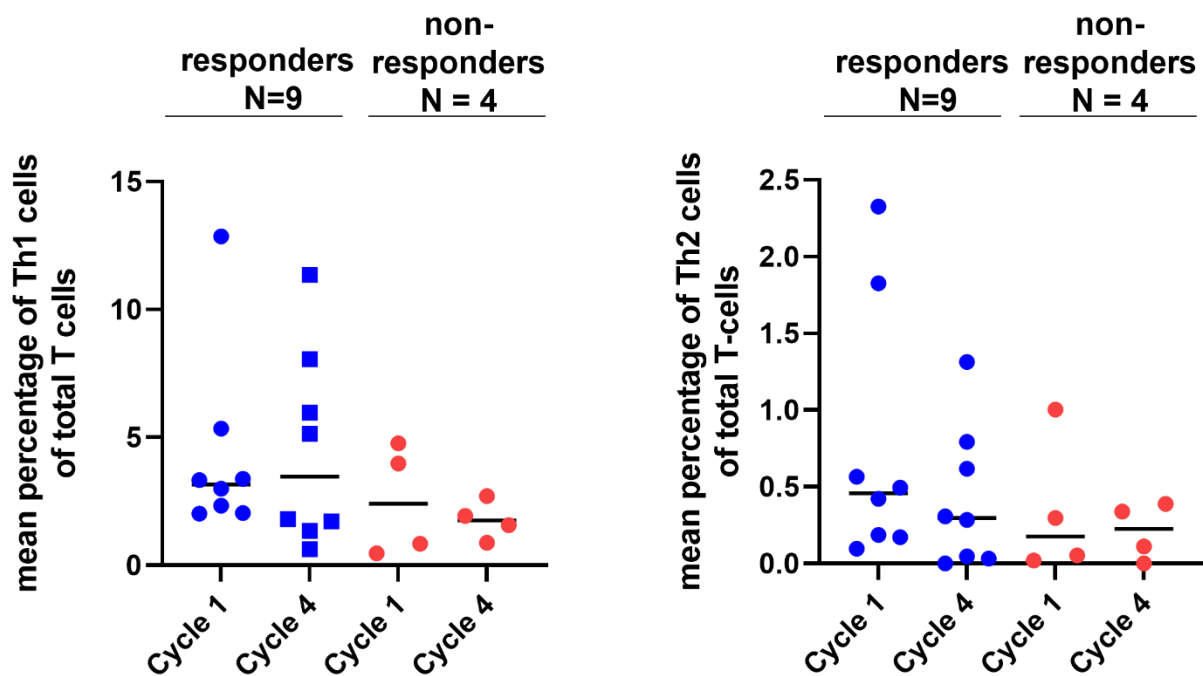

**Figure S3.** Quantification of the average Th1 (left, CD4+Tbet+) and Th2 (CD4+GATA3+) cells at the indicated time points in responders (blue, n=9) and non-responders (red, n=4). Each dot represents an individual patient.
